# Supplementary material
Source: PubMed Central journal article supplement (PMC4869928)
Supplement: PulmCirc-006-234.s001.pdf [file PulmCirc-006-234.s001.pdf]

## Appendix from Wang et al., “Nonmuscle myosin light chain kinase activity modulates radiation-induced lung injury” (Pulm. Circ., vol. 6, no. 2, p. 234)

### Supplementary figures

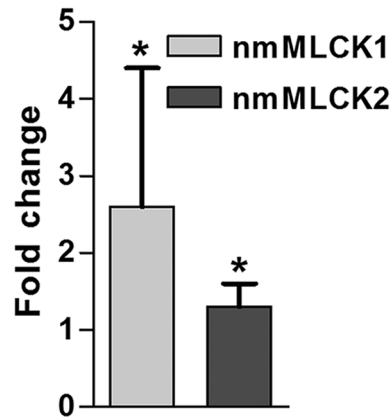

Figure S1. Messenger RNA (mRNA) expression level of two nonmuscle myosin light chain kinase (nmMLCK) variants in radiated lungs after radiation. Compared to control, both nmMLCK1 and nmMLCK2 were increased in mRNA level after 6 weeks of radiation. \* $P < 0.05$ .  $n = 5$ .

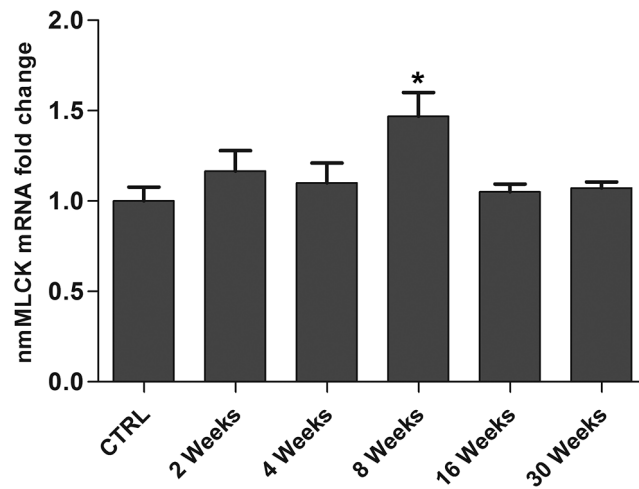

Figure S2. Time-dependent nonmuscle myosin light chain kinase (nmMLCK) expression in murine lungs after radiation. Gene expression in lung tissue from mice (female C57 mice aged 10 weeks) irradiated to 17.5 Gy were analyzed by Affymetrix Mouse430 2.0 microarray chip (Gene Expression Omnibus data set ID: GSE41789), and relative nmMLCK (1425504\_at) levels were analyzed compared to untreated controls. \* $P < 0.05$  compared to control (CTRL). mRNA: messenger RNA.
